# Supplementary material
Source: PubMed Central journal article supplement (PMC3555528)

## SUPPLEMENTARY DATA

FIG. S1. (A) Effect of broad range serine and cysteine protease inhibitors on MP-induced cell death in *C. reinhardtii*. The cells were treated with 1  $\mu\text{M}$  MP and combinations of MP and inhibitors: broad-range serine protease inhibitors 100  $\mu\text{M}$  AEBSF and 10  $\mu\text{M}$  TLCK, and broad-range cysteine protease inhibitors 10  $\mu\text{M}$  IA and 1  $\mu\text{M}$  NEM. (B) Effect of antioxidants on MP-induced cell death in *C. reinhardtii*. The cells were treated with 1  $\mu\text{M}$  MP and combinations of MP and antioxidants: 100  $\mu\text{M}$  L-gal - immediate ascorbic acid precursor and NADPHoxidase inhibitors 10  $\mu\text{M}$  DPI and 100  $\mu\text{M}$  imidazole. Cell death was scored 24 h after application of the chemicals following FDA staining of the living cells, and was calculated as a percentage of dead cells to the total number of cells. Error bars indicate  $\pm$  s.e.m.

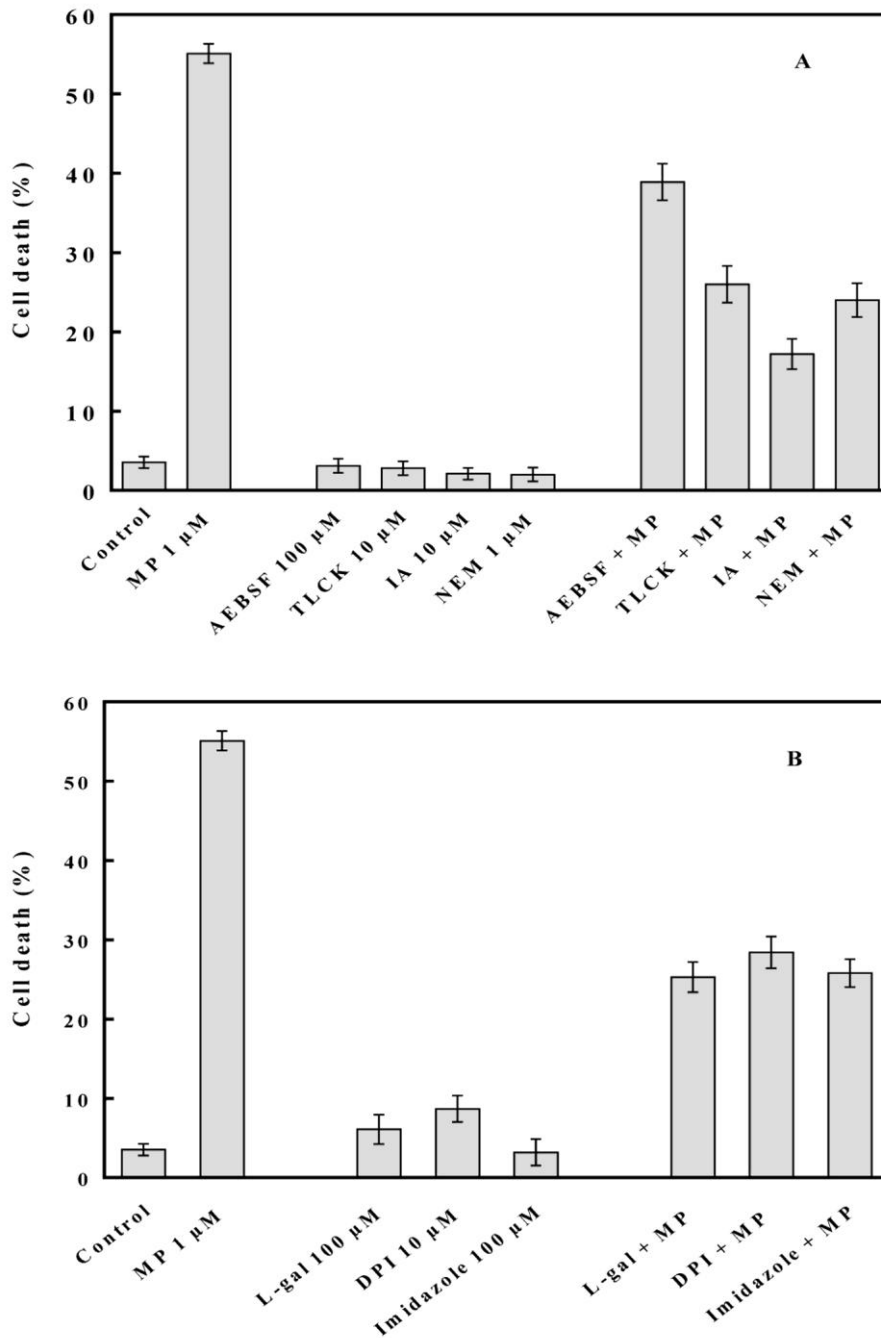

Supplement: supp_mcs264_mcs264supp.pdf [file supp_mcs264_mcs264supp.pdf]
